# Supplementary material for: Spontaneous superlattice formation of ZnO nanocrystals capped with ionic liquid molecules
Source: Royal Society of Chemistry journal article supplement (doi:10.1039/b709211c), 2007-01-01
Supplement: b709211c.pdf [file b709211c.pdf]

## **Electronic Supplementary Information**

### **Spontaneous Superlattice Formation of ZnO Nanocrystals Capped with Ionic Liquid Molecules**

Da-Peng Liu, Guo-Dong Li, Ji-Xue Li, Xin-Hao Li, Jie-Sheng Chen<sup>\*</sup>

*State Key Laboratory of Inorganic Synthesis and Preparative Chemistry, College of Chemistry, Jilin*

*University, Changchun 130012, People's Republic of China*

Fax: (+86)-431-85168624      E-mail: chemcj@mail.jlu.edu.cn

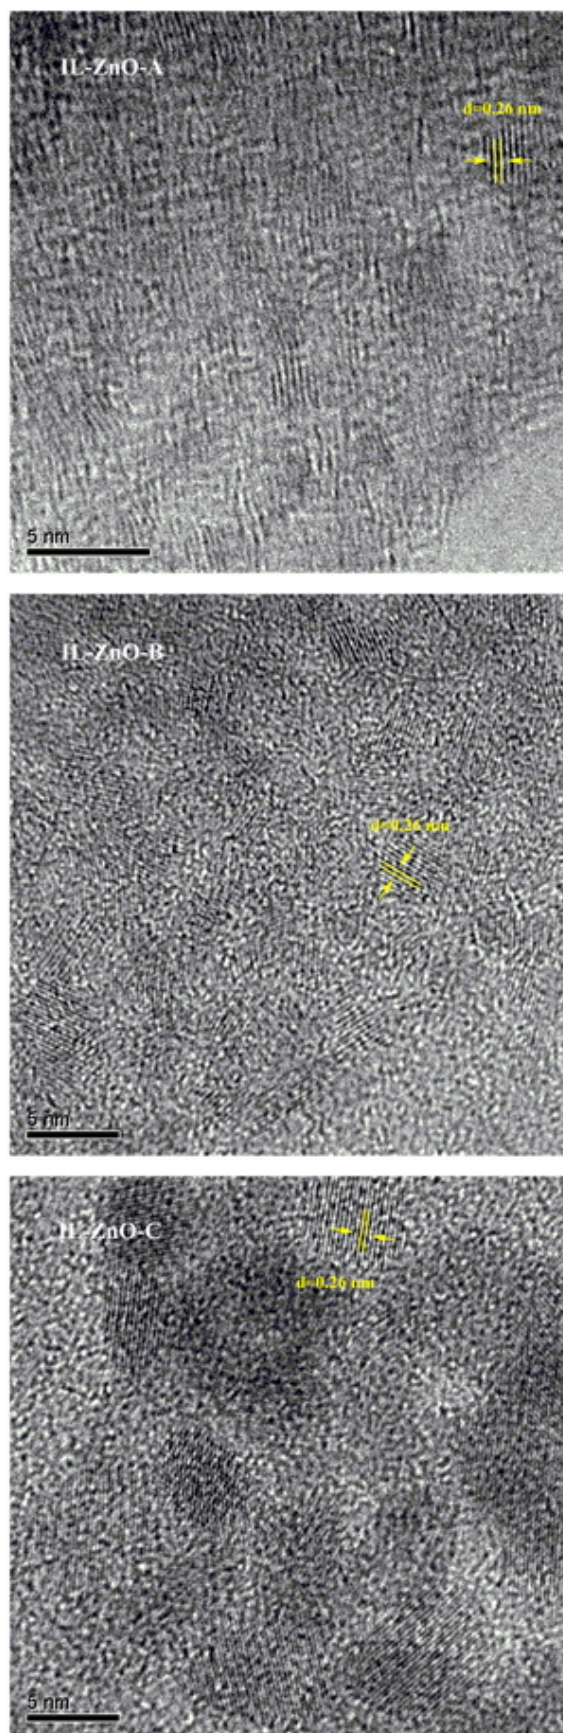

**Figure S1** High-resolution TEM images of three samples (IL-ZnO-A, B and C). All of the images show a lattice plane spacing of 0.26 nm corresponding to the wurtzite structure.
